# Supplementary material for: Structure diversity and reversible anion exchange properties of cadmium(ii) complexes with 1,3,5-tris(imidazol-1-ylmethyl)benzene: counteranion-directed flexible ligand conformational variation
Source: Royal Society of Chemistry journal article supplement (doi:10.1039/b803236j), 2008-01-01
Supplement: b803236j.pdf [file b803236j.pdf]

## Supporting information

### **Structure diversity and reversible anion exchange properties of cadmium(II) complexes with 1,3,5-tris(imidazol-1-ylmethyl)benzene: counteranion-directed flexible ligand conformational variation**

**Guan-Cheng Xu,<sup>a</sup> Yu-Jie Ding,<sup>a</sup> Taka-aki Okamura,<sup>b</sup> Yong-Qing Huang,<sup>a</sup> Guang-Xiang Liu,<sup>a</sup> Wei-Yin Sun<sup>\*a</sup> and Norikazu Ueyama<sup>b</sup>**

*<sup>a</sup>Coordination Chemistry Institute, State Key Laboratory of Coordination Chemistry, School of Chemistry and Chemical Engineering, Nanjing University, Nanjing 210093, China*

*E-mail: [sunwy@nju.edu.cn](mailto:sunwy@nju.edu.cn); Tel: +86-25-83593485*

*<sup>b</sup>Department of Macromolecular Science, Graduate School of Science, Osaka University, Toyonaka, Osaka 560-0043, Japan*

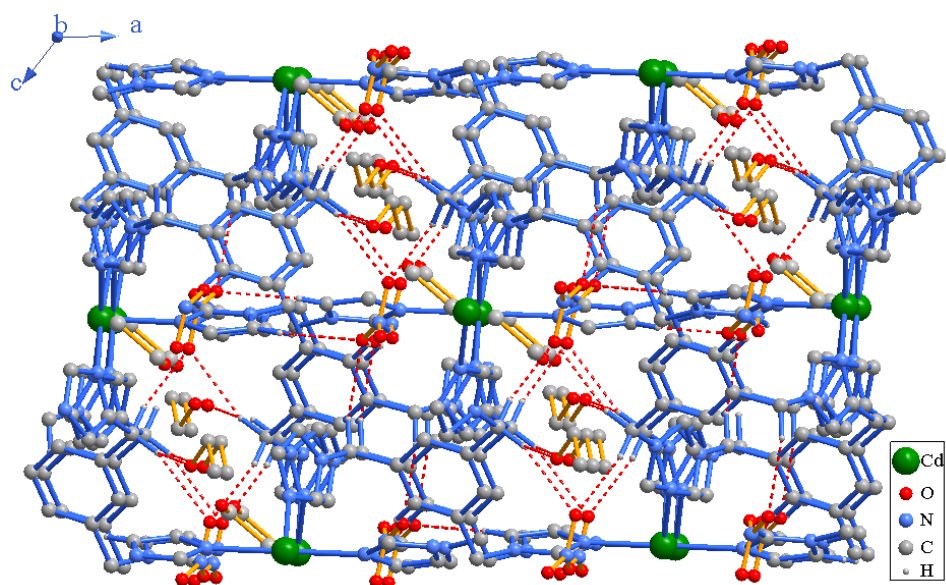

Fig. S1. The ethanol molecules and nitrate anions were filled in channels of the 3D framework of **2**.

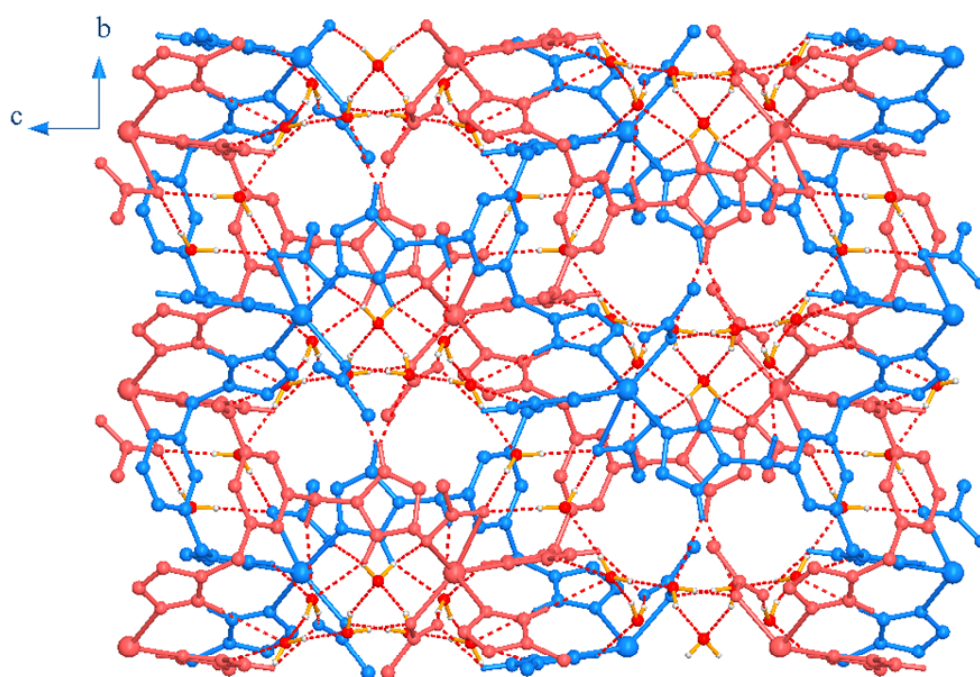

Fig. S2. Crystal packing diagram of **3** with the hydrogen bonds indicated by the dashed lines.

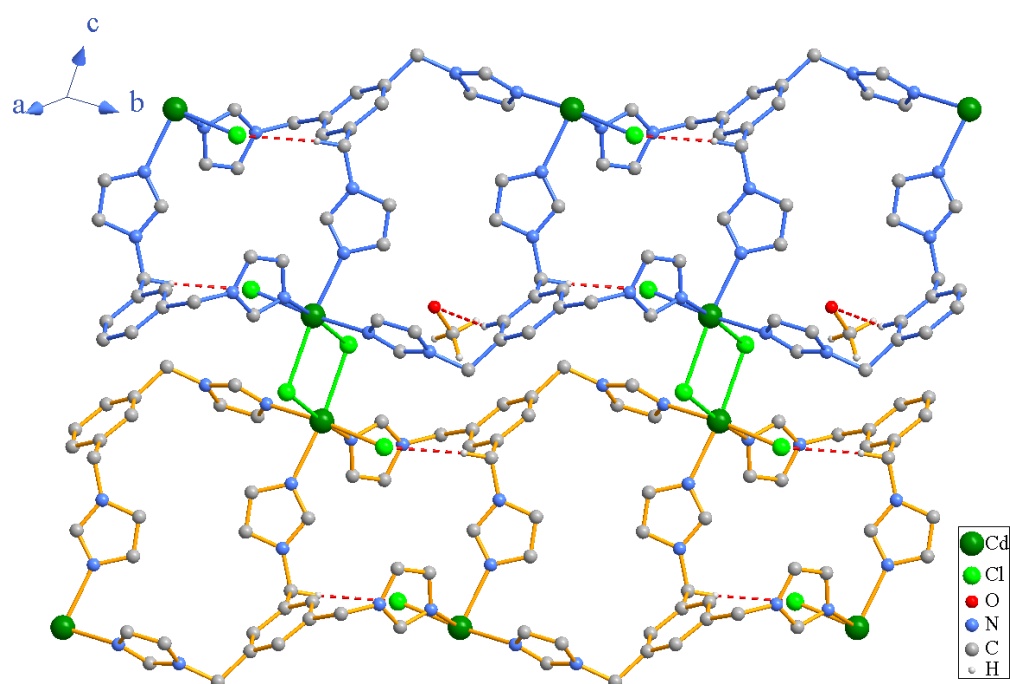

Fig. S3. The intermolecular hydrogen bonds in the 2D network of **4**.

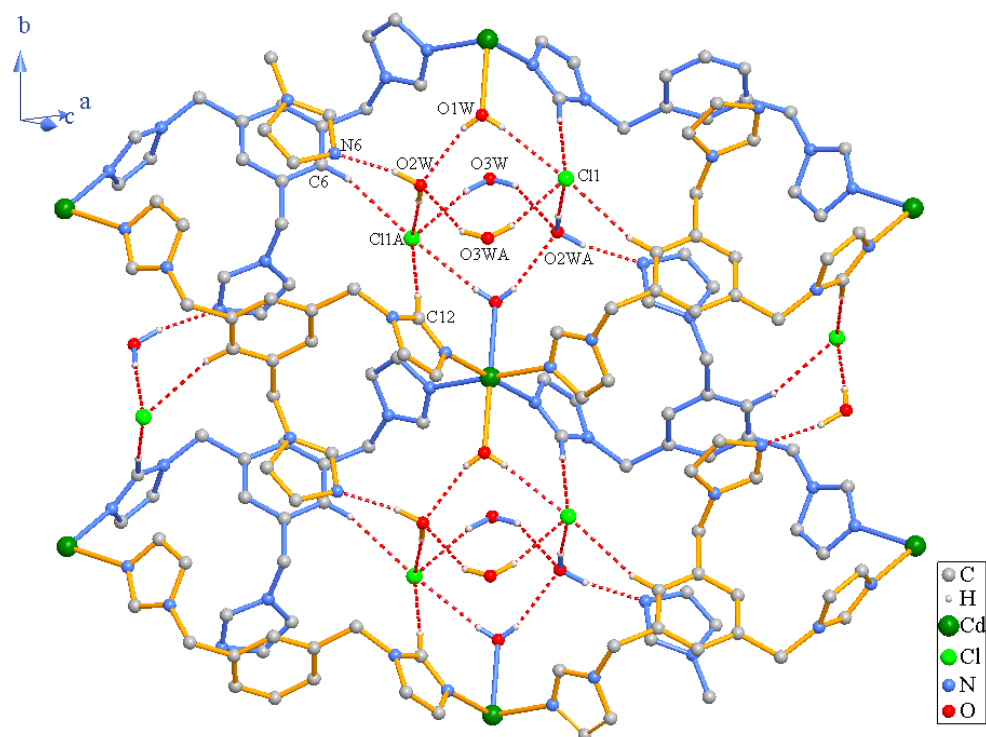

Fig. S4. The hydrogen bonds within the 2D network of **5** indicate in the red dashed lines.

**Table S1** Distances (Å) and angles (deg) of hydrogen bonds for complexes **1-6**

| D-H---A             | Distance (H---A) | Distance (D---A) | Angle (D-H---A) |
|---------------------|------------------|------------------|-----------------|
| <b>Complex 1</b>    |                  |                  |                 |
| C1-H1---F1#1        | 2.4900           | 3.336(4)         | 152             |
| C4-H4B---F2#2, 3, 4 | 2.4800           | 3.275(4)         | 139             |
| <b>Complex 2</b>    |                  |                  |                 |
| C6-H3---O11#5       | 2.5700           | 3.242(11)        | 128             |
| C11-H5---O11#6      | 2.5200           | 3.383(10)        | 146             |
| C31-H9---O13#7      | 2.2100           | 3.109(17)        | 151             |
| C31-H10---O13       | 2.6000           | 3.550(18)        | 161             |
| C31-H10---O22       | 2.6000           | 3.31(2)          | 128             |
| C52-H16---O12       | 2.2400           | 3.133(9)         | 156             |
| C54-H18---O11#5     | 2.4700           | 3.325(17)        | 150             |
| <b>Complex 3</b>    |                  |                  |                 |
| O5-H25---O1         | 1.79(3)          | 2.690(2)         | 168(3)          |
| O6-H26---O2         | 2.01(3)          | 2.872(3)         | 175(3)          |
| O6-H27---O2#8       | 2.12(3)          | 2.927(3)         | 175(2)          |
| O7-H28---O9         | 1.85(4)          | 2.726(3)         | 175(3)          |
| O7-H29---O6#9       | 2.08(3)          | 2.858(3)         | 171(4)          |
| O8-H30---O4         | 2.03(4)          | 2.866(3)         | 159(3)          |
| O8-H31---O7#10      | 2(4)             | 2.849(3)         | 163(4)          |
| O9-H32---O5         | 2.11(4)          | 2.825(3)         | 154(4)          |
| O9-H32---O5         | 2.11(4)          | 2.825(3)         | 154(4)          |
| O9-H33---O3         | 1.76(4)          | 2.694(3)         | 175(4)          |
| C12-H6---O8         | 2.5100           | 3.365(3)         | 151             |
| C13-H7---O7#11      | 2.5600           | 3.417(3)         | 151             |
| C14-H8---O4#12      | 2.4900           | 3.137(3)         | 125             |

|                   |         |          |        |
|-------------------|---------|----------|--------|
| C32-H11---O7#13   | 2.4500  | 3.282(3) | 146    |
| C51-H14---O8#14   | 2.5700  | 3.392(3) | 141    |
| C52-H16---O8#14   | 2.4200  | 3.218(4) | 141    |
| C54-H18---O9#12   | 2.5600  | 3.371(4) | 144    |
| <b>Complex 4</b>  |         |          |        |
| C4-H4A---O1#15    | 2.6000  | 3.462(9) | 155    |
| C11-H11A---Cl2    | 2.7200  | 3.664(7) | 166    |
| <b>Complex 5</b>  |         |          |        |
| O1W-H1WA---C11    | 2.48(4) | 3.160(4) | 170(4) |
| O1W-H1WB---O2W#16 | 2.18(6) | 2.812(6) | 160(7) |
| O2W-H2WB---C11#17 | 2.29(6) | 3.164(4) | 176(5) |
| O2W-H2WA---N6#18  | 1.91(4) | 2.769(6) | 169(5) |
| O3W-H3WA---C11#19 | 2.32(5) | 3.191(6) | 167(6) |
| O3W-H3WB---O2W#20 | 2.16(5) | 2.955(7) | 151(6) |
| C6-H6---C11#15    | 2.6600  | 3.568(4) | 165    |
| C12-H12---C11#17  | 2.6100  | 3.541(4) | 177    |
| C7-H7B---C11#21   | 2.7800  | 3.668(4) | 152    |
| C10-H10---O3W#22  | 2.5900  | 3.375(7) | 143    |
| <b>Complex 6</b>  |         |          |        |
| C34-H13---I2      | 3.110   | 3.969    | 151    |
| C52-H16---I2#23   | 3.066   | 3.896    | 147    |
| C32-H11---I3#23   | 3.171   | 3.792    | 125    |

Symmetry transformations used to generate equivalent atoms: #1: 1+x, y, z. #2: 2/3-x, 1/3-y, 1/3-z. #3: 2/3+y, 1/3-x+y, 1/3-z. #4: 2/3+x-y, 1/3+x, 1/3-z. #5: 3/2-x, 1/2+y, 3/2-z. #6: -1/2+x, 3/2-y, -1/2+z. #7: 3/2-x, 3/2-y, 1-z. #8: 3/2-x, 1/2-y, 1-z. #9: x, 1-y, 1/2+z. #10: 1-x, y, 3/2-z. #11: x, 1-y, -1/2+z. #12: 1-x, 1-y, 1-z. #13: -1/2+x, 1/2-y, -1/2+z. #14: 1/2-x, 1/2-y, 1-z. #15: x, -1+y, z. #16: -1+x, 3/2-y, -1/2+z. #17: 1-x, -1/2+y, 1/2-z. #18: x, 1+y, z. #19: 1+x, -1+y, z. #20: x, 1/2-y, -1/2+z. #21: -x, -1/2+y, 1/2-z. #22: 1-x, 1/2+y, 1/2-z. #23: -1+x, y, z.
